# Supplementary material for: Enzymatically Modified Low‐Density Lipoprotein Is Present in All Stages of Aortic Valve Sclerosis: Implications for Pathogenesis of the Disease
Source: PubMed Central journal article supplement — J Am Heart Assoc. 2015 Oct 16;4(10):e002156. doi: 10.1161/JAHA.115.002156 (PMC4845139; doi:10.1161/jaha.115.002156), 2015-10-16
Supplement: JAH3-4-e002156-s001.pdf [file JAH3-4-e002156-s001.pdf]

## SUPPLEMENTAL MATERIAL

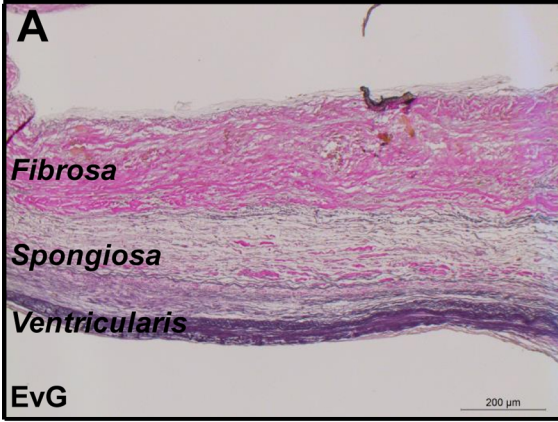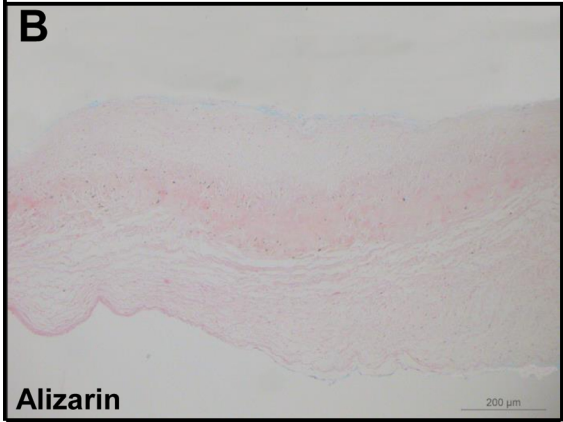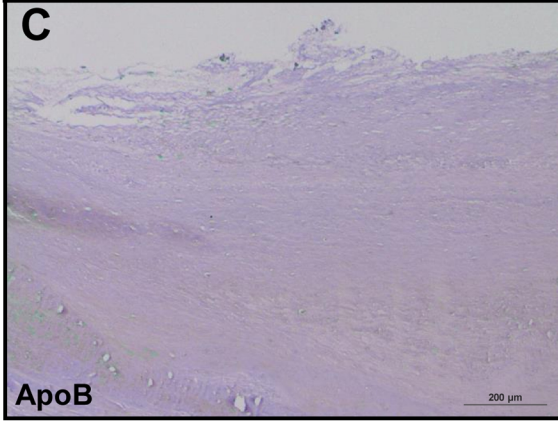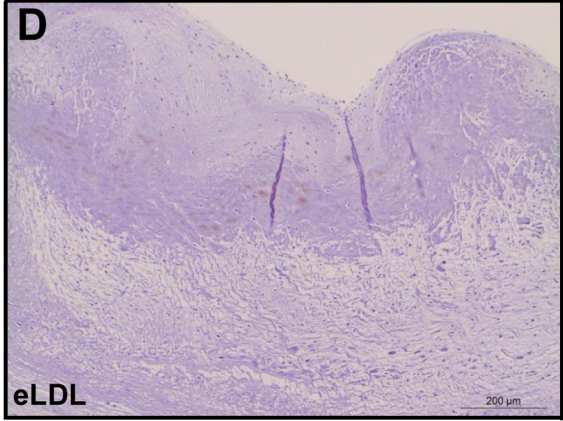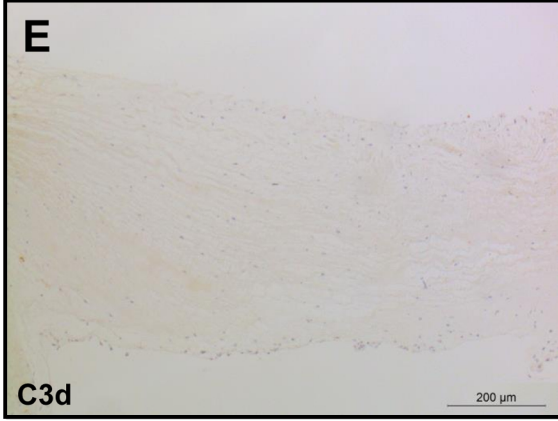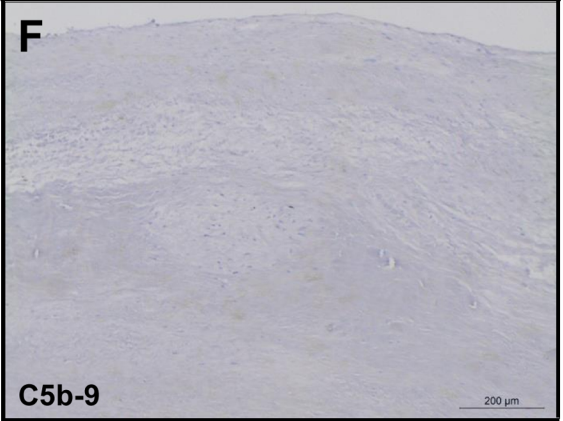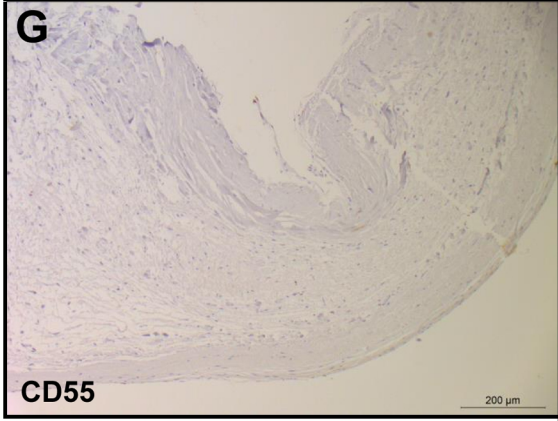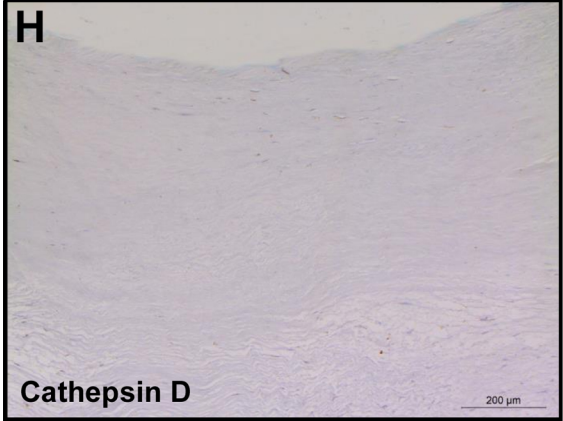

**Figure S1**

**Figure S1.** Internal control tissues for both histochemistry and immunohistochemistry comprising unaffected areas of eight different aortic valves. In **A**, note the aortic valve leaflet composed of three anatomic layers: the fibrosa, a collagen-rich layer on the aortic side of the valve (top layer); the spongiosa, a layer of variable thickness lying between the fibrosa and ventricularis, with a less dense matrix and often containing adipose cells and the ventricularis, a layer with prominent elastin fibers located on the ventricular side of the valve (bottom layer). In **B** to **F**, note the lack of calcified areas (**B**) as well as any of the antigens detected from Grade 1 upward (**C** to **F**, compare with figures 1, 2, 3 and 5).

| Table S1    |                                                                |                                                                                             | Affymetrix Human Gene 1.0 ST |                              | Affymetrix Human Genome U133 Plus 2.0 (Bossé et al.) |                              | Affymetrix Human Gene 1.0 ST vs Affymetrix Human Genome U133 Plus 2.0 (Bossé et al.) |                          |                       |                  |                      |
|-------------|----------------------------------------------------------------|---------------------------------------------------------------------------------------------|------------------------------|------------------------------|------------------------------------------------------|------------------------------|--------------------------------------------------------------------------------------|--------------------------|-----------------------|------------------|----------------------|
| Gene Symbol | Heatmap ID                                                     | Gene Description                                                                            | Probe Set Name               | Mean log <sub>2</sub> Signal | Probe Set Name                                       | Mean log <sub>2</sub> Signal | Fold Change                                                                          | unadjusted limma p-Value | Helm-adjusted p-Value | Percent Identity | SIF Percent Identity |
| CIQA        |                                                                | complement component 1, alpha chain                                                         | 789793                       | 6.86                         | 218232_at                                            | 9.14                         | 0.18                                                                                 | 7.22E-06                 | 3.01E-05              | 99.14            | 100                  |
| CIRL        | [I]                                                            | complement component 1, subcomponent-like                                                   | 7960757                      | 6.74                         | 233645_s_at                                          | 6.58                         | 0.28                                                                                 | 2.07E-07                 | 1.90E-06              | 95.53            | 99.36                |
|             | [II]                                                           | complement component 1, subcomponent-like                                                   | 7960757                      | 6.74                         | 218983_at                                            | 5.49                         | 2.38                                                                                 | 2.11E-05                 | 7.30E-05              | 99.88            | 100                  |
| C1S         | [I]                                                            | complement component 1, s subcomponent                                                      | 7953603                      | 9.78                         | 208747_s_at                                          | 10.88                        | 0.46                                                                                 | 6.58E-04                 | 0.0014                | 99.81            | 100                  |
|             | [II]                                                           | complement component 1, s subcomponent                                                      | 7953603                      | 9.78                         | 1655229_a_at                                         | 9.09                         | 1.61                                                                                 | 0.0135                   | 0.021                 | 95.3             | 99.22                |
| C2          | [I]                                                            | complement component 2                                                                      | 8118324                      | 6.39                         | 1554533_at                                           | 4.33                         | 4.2                                                                                  | 4.07E-06                 | 1.88E-05              | 94.3             | 100                  |
|             | [II]                                                           | complement component 2                                                                      | 8119324                      | 6.39                         | 203093_at                                            | 6.5                          | 0.7                                                                                  | 0.0684                   | 0.0913                | 99.95            | 100                  |
| C3          |                                                                | complement component 3                                                                      | 8033257                      | 10.2                         | 217767_at                                            | 9.21                         | 2                                                                                    | 0.0035                   | 0.00618               | 99.92            | 99.82                |
| C4A         | [I]                                                            | complement component 4A (Rodgers blood group)                                               | 8118409                      | 6.92                         | 214428_s_at                                          | 7.88                         | 0.51                                                                                 | 5.31E-04                 | 0.00191               | 96.04            | 99.84                |
|             | [II]                                                           | complement component 4A (Rodgers blood group)                                               | 8118409                      | 6.92                         | 208451_s_at                                          | 7.44                         | 0.7                                                                                  | 0.0497                   | 0.0685                | 99.94            | 100                  |
| CBPA        |                                                                | complement component 4 binding protein, alpha                                               | 789318                       | 4.19                         | 205654_at                                            | 6.44                         | 0.21                                                                                 | 4.10E-07                 | 3.18E-06              | 99.91            | 100                  |
| CBPB        |                                                                | complement component 4 binding protein, beta                                                | 7909306                      | 4.44                         | 208209_s_at                                          | 5.86                         | 0.37                                                                                 | 1.28E-05                 | 4.77E-05              | 0                | 100                  |
| C5          |                                                                | complement component 5                                                                      | 8163839                      | 5.26                         | 205500_at                                            | 4.8                          | 1.38                                                                                 | 0.0141                   | 0.0219                | 99.87            | 100                  |
| C6          |                                                                | complement component 6                                                                      | 8111864                      | 5.58                         | 210168_at                                            | 8.21                         | 0.16                                                                                 | 3.58E-06                 | 1.89E-05              | 99.97            | 100                  |
| C7          |                                                                | complement component 7                                                                      | 8105084                      | 10.7                         | 202992_at                                            | 11.82                        | 0.46                                                                                 | 4.99E-04                 | 0.0011                | 99.77            | 100                  |
| C8A         |                                                                | complement component 8, alpha polypeptide                                                   | 7901732                      | 4.33                         | 208305_s_at                                          | 5.01                         | 0.62                                                                                 | 0.00194                  | 0.00384               | 99.79            | 100                  |
| C8B         |                                                                | complement component 8, beta polypeptide                                                    | 7916526                      | 4.75                         | 208979_at                                            | 5.69                         | 0.52                                                                                 | 8.04E-04                 | 0.00167               | 99.95            | 99.8                 |
| C8G         |                                                                | complement component 8, gamma polypeptide                                                   | 8159491                      | 5.93                         | 210324_at                                            | 5.01                         | 1.91                                                                                 | 1.40E-04                 | 3.64E-04              | 99.12            | 99.8                 |
| CD46        | [I]                                                            | CD46 molecule, complement regulatory protein                                                | 7909400                      | 7.82                         | 207549_s_at                                          | 5.34                         | 5.55                                                                                 | 3.10E-07                 | 2.97E-06              | 99.52            | 100                  |
|             | [II]                                                           | CD46 molecule, complement regulatory protein                                                | 7909400                      | 7.82                         | 211574_s_at                                          | 6.16                         | 3.15                                                                                 | 2.05E-05                 | 7.11E-05              | 100              | 100                  |
| [III]       | CD46 molecule, complement regulatory protein                   | 7909400                                                                                     | 7.82                         | 208783_s_at                  | 7.88                                                 | 0.95                         | 0.06                                                                                 | 0.788                    | 98.4                  | 99.0             |                      |
| CD55        | [I]                                                            | CD55 molecule, decay accelerating factor for complement (Domey blood group)                 | 7909332                      | 8.86                         | 1555850_a_at                                         | 5.79                         | 8.97                                                                                 | 3.75E-08                 | 5.47E-07              | 95.94            | 100                  |
|             | [II]                                                           | CD55 molecule, decay accelerating factor for complement (Domey blood group)                 | 7909332                      | 8.86                         | 201925_s_at                                          | 6.88                         | 4.21                                                                                 | 3.50E-05                 | 1.12E-04              | 54.57            | 100                  |
| CFB         | [I]                                                            | complement factor B                                                                         | 8118345                      | 7.01                         | 211920_at                                            | 5.04                         | 3.89                                                                                 | 3.54E-06                 | 1.87E-05              | 99.89            | 100                  |
|             | [II]                                                           | complement factor B                                                                         | 8118345                      | 7.01                         | 202837_s_at                                          | 5.64                         | 2.57                                                                                 | 1.80E-04                 | 4.78E-04              | 99.92            | 100                  |
| CFD         |                                                                | complement factor D (adipin)                                                                | 8024062                      | 7.54                         | 205382_s_at                                          | 8.54                         | 0.5                                                                                  | 5.85E-04                 | 4.87E-04              | 99.44            | 100                  |
| CFH         |                                                                | complement factor H                                                                         | 7908459                      | 10.44                        | 213800_at                                            | 9.89                         | 1.46                                                                                 | 0.0149                   | 0.023                 | 94.6             | 100                  |
| CFHR1       |                                                                | complement factor H-related 1                                                               | 7908488                      | 6.03                         | 215388_s_at                                          | 9.67                         | 0.08                                                                                 | 6.30E-11                 | 1.00E-08              | 99.08            | 98.46                |
| CLU         | [I]                                                            | clustrin                                                                                    | 8149927                      | 11.44                        | 208791_at                                            | 12.42                        | 0.5                                                                                  | 0.00117                  | 0.00234               | 99.88            | 99.75                |
|             | [II]                                                           | clustrin                                                                                    | 8149927                      | 11.44                        | 208792_s_at                                          | 10.57                        | 1.82                                                                                 | 0.00401                  | 0.00699               | 99.88            | 100                  |
| CR1         | [I]                                                            | complement component (3b/4b) receptor 1 (Knops blood group)                                 | 7909371                      | 5.79                         | 244313_at                                            | 4.76                         | 2.05                                                                                 | 0.0164                   | 0.025                 | 99.62            | 99.04                |
|             | [II]                                                           | complement component (3b/4b) receptor 1 (Knops blood group)                                 | 7909371                      | 5.79                         | 239205_s_at                                          | 6.69                         | 0.54                                                                                 | 0.0382                   | 0.0514                | 99.56            | 99.96                |
| [III]       | complement component (3b/4b) receptor 1 (Knops blood group)    | 7909371                                                                                     | 5.79                         | 208244_at                    | 5.39                                                 | 1.32                         | 0.299                                                                                | 0.348                    | 99.86                 | 99.81            |                      |
| [IV]        | complement component (3b/4b) receptor 1 (Knops blood group)    | 7909371                                                                                     | 5.79                         | 208488_s_at                  | 5.71                                                 | 1.06                         | 0.836                                                                                | 0.881                    | 99.87                 | 99.81            |                      |
| CR2         |                                                                | complement component (3d/Epstein Bar virus) receptor 2                                      | 7909350                      | 4.11                         | 205544_s_at                                          | 5.57                         | 0.36                                                                                 | 1.90E-05                 | 6.67E-05              | 99.9             | 99.8                 |
| CRP         | [I]                                                            | C-reactive protein, pentraxin-related                                                       | 7921449                      | 4.38                         | 205753_at                                            | 5.34                         | 0.51                                                                                 | 7.77E-04                 | 0.00182               | 99.45            | 99.77                |
|             | [II]                                                           | C-reactive protein, pentraxin-related                                                       | 7921449                      | 4.38                         | 37020_at                                             | 4.68                         | 0.81                                                                                 | 0.178                    | 0.217                 | 94.59            | 90.62                |
| CTSC        | [I]                                                            | cathepsin C                                                                                 | 7950906                      | 8.8                          | 22647_s_at                                           | 5.14                         | 12.71                                                                                | 1.88E-06                 | 8.89E-06              | 94.83            | 100                  |
|             | [II]                                                           | cathepsin C                                                                                 | 7950906                      | 8.8                          | 225646_at                                            | 5.75                         | 8.29                                                                                 | 1.04E-05                 | 4.04E-05              | 94.83            | 100                  |
| [III]       | cathepsin C                                                    | 7950906                                                                                     | 8.8                          | 201487_at                    | 8.47                                                 | 1.26                         | 0.44                                                                                 | 0.49                     | 99.95                 | 100              |                      |
| CTSD        |                                                                | cathepsin D                                                                                 | 7945666                      | 9.66                         | 200766_at                                            | 7.2                          | 5.53                                                                                 | 1.76E-06                 | 9.88E-06              | 99.95            | 100                  |
| CTSZ        |                                                                | cathepsin Z                                                                                 | 8067279                      | 8.37                         | 210042_s_at                                          | 7.33                         | 2.06                                                                                 | 0.00231                  | 0.00428               | 99.16            | 99.24                |
| FCN2        |                                                                | ficolin (collagen/fibrinogen domain containing lectin) 2 (hucolin)                          | 8159211                      | 5.89                         | 207804_s_at                                          | 4.48                         | 2.66                                                                                 | 1.58E-05                 | 5.86E-05              | 99.62            | 99.7                 |
| FCN3        |                                                                | ficolin (collagen/fibrinogen domain containing) 3 (Hakata antigen)                          | 7914075                      | 6.13                         | 205866_at                                            | 4.44                         | 3.23                                                                                 | 8.24E-07                 | 5.36E-06              | 66.09            | 99.76                |
| IL6R        | [I]                                                            | interleukin 6 receptor                                                                      | 7905789                      | 5.83                         | 205945_at                                            | 4.92                         | 1.89                                                                                 | 5.09E-05                 | 1.53E-04              | 99.84            | 99.57                |
|             | [II]                                                           | interleukin 6 receptor                                                                      | 7905789                      | 5.83                         | 226333_at                                            | 5.51                         | 1.24                                                                                 | 0.0532                   | 0.0728                | 98.25            | 100                  |
| [III]       | interleukin 6 signal transducer (gp130, oncostatin M receptor) | 8112139                                                                                     | 9.27                         | 211000_s_at                  | 5.23                                                 | 16.47                        | 1.89E-09                                                                             | 7.41E-08                 | 99.95                 | 100              |                      |
| IL6ST       | [I]                                                            | interleukin 6 receptor                                                                      | 8112139                      | 9.27                         | 212195_at                                            | 10.81                        | 0.35                                                                                 | 3.04E-05                 | 9.91E-05              | 98.85            | 100                  |
|             | [II]                                                           | interleukin 6 signal transducer (gp130, oncostatin M receptor)                              | 8112139                      | 9.27                         | 212196_at                                            | 8.22                         | 2.08                                                                                 | 7.70E-04                 | 0.00161               | 98.85            | 100                  |
| KRT1        |                                                                | keratin 1                                                                                   | 7963491                      | 4.52                         | 205900_at                                            | 5.83                         | 0.4                                                                                  | 9.50E-05                 | 2.60E-04              | 99.28            | 98.32                |
| MASP1       | [I]                                                            | mannan-binding lectin serine peptidase 1 (C4/C2 activating component of R3-reactive factor) | 8092661                      | 6.43                         | 232224_at                                            | 7.52                         | 0.47                                                                                 | 5.43E-04                 | 0.00119               | 99.96            | 99.22                |
|             | [II]                                                           | mannan-binding lectin serine peptidase 1 (C4/C2 activating component of R3-reactive factor) | 8092661                      | 6.43                         | 208449_s_at                                          | 6.13                         | 1.23                                                                                 | 0.17                     | 0.2                   | 99.29            | 99.56                |
| MASP2       |                                                                | mannan-binding lectin serine peptidase 2                                                    | 7912361                      | 4.86                         | 207041_at                                            | 7.53                         | 0.16                                                                                 | 1.53E-09                 | 6.42E-08              | 99.23            | 100                  |
| MMP12       |                                                                | matrix metalloproteinase 12 (macrophage elastase)                                           | 7951297                      | 4.49                         | 204580_at                                            | 5.78                         | 0.41                                                                                 | 9.36E-04                 | 1.60E-05              | 100              | 100                  |
| MMP13       |                                                                | matrix metalloproteinase 13 (collagenase 3)                                                 | 7951309                      | 4.39                         | 205959_at                                            | 5.46                         | 0.48                                                                                 | 0.0023                   | 0.00424               | 99.71            | 99.75                |
| MMP14       | [I]                                                            | matrix metalloproteinase 14 (membrane-inserted)                                             | 7973336                      | 6.92                         | 217279_s_at                                          | 7.81                         | 0.82                                                                                 | 0.00855                  | 0.0139                | 94.21            | 83.58                |
|             | [II]                                                           | matrix metalloproteinase 14 (membrane-inserted)                                             | 7973336                      | 6.92                         | 202827_s_at                                          | 6.45                         | 1.38                                                                                 | 0.0642                   | 0.0863                | 99.97            | 100                  |
| MMP16       | [I]                                                            | matrix metalloproteinase 16 (membrane-inserted)                                             | 8151886                      | 5.55                         | 207013_s_at                                          | 6.89                         | 0.39                                                                                 | 2.62E-06                 | 1.33E-05              | 99.86            | 99.81                |
|             | [II]                                                           | matrix metalloproteinase 16 (membrane-inserted)                                             | 8151886                      | 5.55                         | 207012_at                                            | 4.8                          | 1.68                                                                                 | 1.96E-04                 | 4.85E-04              | 99.84            | 99.58                |
| [III]       | matrix metalloproteinase 16 (membrane-inserted)                | 8151886                                                                                     | 5.55                         | 208166_at                    | 4.82                                                 | 1.66                         | 6.90E-04                                                                             | 0.00146                  | 98.54                 | 99.25            |                      |
| [IV]        | matrix metalloproteinase 16 (membrane-inserted)                | 8151886                                                                                     | 5.55                         | 208187_at                    | 5.02                                                 | 1.45                         | 0.00291                                                                              | 0.00354                  | 98.54                 | 99.25            |                      |
| MMP17       |                                                                | matrix metalloproteinase 17 (membrane-inserted)                                             | 7959946                      | 5.18                         | 206234_s_at                                          | 5.56                         | 0.77                                                                                 | 0.0335                   | 0.0479                | 99.42            | 99.49                |
| MMP19       | [I]                                                            | matrix metalloproteinase 19                                                                 | 7960308                      | 7.04                         | 227106_at                                            | 8.38                         | 0.4                                                                                  | 4.44E-05                 | 1.38E-04              | 91.52            | 100                  |
|             | [II]                                                           | matrix metalloproteinase 19                                                                 | 7963946                      | 6.87                         | 204574_s_at                                          | 7.76                         | 0.54                                                                                 | 0.00301                  | 0.0054                | 99.72            | 100                  |
| [III]       | matrix metalloproteinase 19                                    | 7963946                                                                                     | 6.87                         | 204575_s_at                  | 7.77                                                 | 0.54                         | 0.00369                                                                              | 0.00648                  | 99.79                 | 99.81            |                      |
| MMP23B      |                                                                | matrix metalloproteinase 23B                                                                | 7897006                      | 7.17                         | 207118_s_at                                          | 4.96                         | 4.64                                                                                 | 5.49E-09                 | 1.49E-07              | 98.46            | 100                  |
| MMP25       | [I]                                                            | matrix metalloproteinase 25                                                                 | 7992811                      | 5.51                         | 207289_at                                            | 7.42                         | 0.27                                                                                 | 1.27E-08                 | 7.47E-06              | 99.84            | 0                    |
|             | [II]                                                           | matrix metalloproteinase 25                                                                 | 7992811                      | 5.51                         | 207890_s_at                                          | 4.79                         | 1.85                                                                                 | 0.00119                  | 0.00237               | 65.79            | 100                  |
| MMP28       | [I]                                                            | matrix metalloproteinase 28                                                                 | 8014282                      | 6.1                          | 224207_s_at                                          | 9.09                         | 0.13                                                                                 | 1.87E-10                 | 1.73E-08              | 96.62            | 99.25                |
|             | [II]                                                           | matrix metalloproteinase 28                                                                 | 8014282                      | 6.1                          | 222937_s_at                                          | 8.59                         | 0.18                                                                                 | 1.45E-09                 | 6.19E-08              | 99.83            | 100                  |
| [III]       | matrix metalloproteinase 28                                    | 8014282                                                                                     | 6.1                          | 239273_s_at                  | 4.55                                                 | 2.93                         | 5.43E-07                                                                             | 3.92E-06                 | 95.64                 | 100              |                      |
| [IV]        | matrix metalloproteinase 28                                    | 8014282                                                                                     | 6.1                          | 219909_at                    | 4.9                                                  | 2.28                         | 5.87E-06                                                                             | 2.57E-05                 | 98.43                 | 100              |                      |
| PLAT        |                                                                | plasminogen activator, tissue                                                               | 8150509                      | 9.04                         | 201860_s_at                                          | 7.38                         | 0.18                                                                                 | 9.33E-04                 | 0.00191               | 99.96            | 100                  |
| PLAU        | [I]                                                            | plasminogen activator, urokinase                                                            | 7928429                      | 6.81                         | 211686_s_at                                          | 6.29                         | 1.43                                                                                 | 0.0231                   | 0.0341                | 99.86            | 99.77                |
|             | [II]                                                           | plasminogen activator, urokinase                                                            | 7928429                      | 6.81                         | 204778_s_at                                          | 7.01                         | 0.87                                                                                 | 0.361                    | 0.411                 | 99.13            | 99.2                 |
| PLG         |                                                                | plasminogen                                                                                 | 8123259                      | 5.31                         | 209978_s_at                                          | 4.63                         | 1.59                                                                                 | 0.00176                  | 0.00335               | 18.26            | 99.75                |
| [I]         | plasminogen                                                    | 8123259                                                                                     | 5.31                         | 209977_at                    | 4.96                                                 | 1.27                         | 0.0863                                                                               | 0.0888                   | 18.26                 | 99.74            |                      |
| SERPINC1    |                                                                | serpin peptidase inhibitor, clade G (C1 inhibitor), member 1                                | 7940028                      | 10.32                        | 200986_at                                            | 7.65                         | 6.38                                                                                 | 4.46E-08                 | 6.22E-07              | 100              | 100                  |
| TPSD1       |                                                                | tyrosinase delta 1                                                                          | 7992191                      | 6.58                         | 214568_at                                            | 5.44                         | 2.2                                                                                  | 2.33E-05                 | 7.94E-05              | 100              | 100                  |

**Table S1.** Results of comparison between cases (n = 4) and controls (n = 4) for selected genes by microarray analysis.
